# Supplementary material
Source: publisher figshare collection journal article supplement (https://acs.figshare.com/ndownloader/files/4186447)
Supplement: Supplementary file 1 [file 4186447]

#======================================================================

# CRYSTAL DATA

#----------------------------------------------------------------------

data_VESTA_phase_1


_pd_phase_name                         'Sr2VO2.99H1.01'
_cell_length_a                         3.68110
_cell_length_b                         3.88780
_cell_length_c                         12.78390
_cell_angle_alpha                      90
_cell_angle_beta                       90
_cell_angle_gamma                      90
_symmetry_space_group_name_H-M         'I m m m'
_symmetry_Int_Tables_number            71

loop_
_symmetry_equiv_pos_as_xyz
   'x, y, z'
   '-x, -y, -z'
   '-x, -y, z'
   'x, y, -z'
   '-x, y, -z'
   'x, -y, z'
   'x, -y, -z'
   '-x, y, z'
   'x+1/2, y+1/2, z+1/2'
   '-x+1/2, -y+1/2, -z+1/2'
   '-x+1/2, -y+1/2, z+1/2'
   'x+1/2, y+1/2, -z+1/2'
   '-x+1/2, y+1/2, -z+1/2'
   'x+1/2, -y+1/2, z+1/2'
   'x+1/2, -y+1/2, -z+1/2'
   '-x+1/2, y+1/2, z+1/2'

loop_
   _atom_site_label
   _atom_site_occupancy
   _atom_site_fract_x
   _atom_site_fract_y
   _atom_site_fract_z
   _atom_site_adp_type
   _atom_site_B_iso_or_equiv
   _atom_site_type_symbol
   Sr1        1.0     0.000000      0.000000      0.351390     Biso  0.495295 Sr
   V1         1.0     0.000000      0.000000      0.000000     Biso  0.236870 V
   O1         0.9500  0.500000      0.000000      0.500000     Biso  0.183337 O
   O2         0.9850  0.000000      0.000000      0.156740     Biso  0.378045 O
   H3         0.9300  0.000000      0.500000      0.500000     Biso  1.692990 H
   H1         0.0500  0.500000      0.000000      0.500000     Biso  0.183337 H
   H2         0.0150  0.000000      0.000000      0.156740     Biso  0.378045 H
   O3         0.0700  0.000000      0.500000      0.500000     Biso  1.692990 O
